# Supplementary material for: Unveiling the non-covalent interactions of molecular homodimers by dispersion-corrected DFT calculations and collision-induced broadening of ro-vibrational transitions: application to (CH2F2)2 and (SO2)2
Source: Royal Society of Chemistry journal article supplement (doi:10.1039/c4cp05680a), 2015-01-01
Supplement: c4cp05680a1.pdf [file c4cp05680a1.pdf]

**Unveiling the non-covalent interactions of molecular homodimers by dispersion-corrected  
DFT calculations and collision-induced broadening of ro-vibrational transitions:  
application to (CH<sub>2</sub>F<sub>2</sub>)<sub>2</sub> and (SO<sub>2</sub>)<sub>2</sub>**

Nicola Tasinato,<sup>a</sup> Stefan Grimme<sup>b</sup>

<sup>a</sup> *Dipartimento di Scienze Molecolari e Nanosistemi, Università Ca' Foscari Venezia, Calle Larga S. Marta  
2137, I-30123 Venezia, Italy*

<sup>b</sup> *Mulliken Center for Theoretical Chemistry, Institut für Physikalische und Theoretische Chemie der  
Universität Bonn, Berlingstrasse 4, D-53115 Bonn, Germany.*

**Supporting Information**

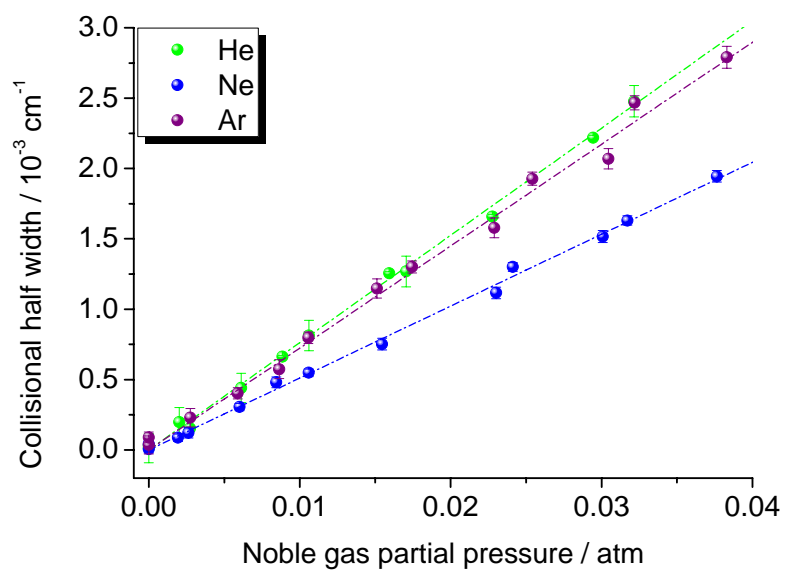

Figure S.1. Collisional half widths and corresponding linear fits for the  $25_{10,15} \leftarrow 24_{9,15}$  ro-vibrational transition of the  $\nu_7$  band of  $\text{CH}_2\text{F}_2$  perturbed by noble gases (circles: experimental half widths; straight line: linear fit of Lorentzian half widths against the buffer gas partial pressure).

Table S.1. Relative energies (kcal mol<sup>-1</sup>) of the stationary points on the PES of (CH<sub>2</sub>F<sub>2</sub>)<sub>2</sub> and (SO<sub>2</sub>)<sub>2</sub> at CCSD(T)/CBS, DFT-D3/def2-TZVP and DFT/def2-TZVP levels of theory.

| (CH <sub>2</sub> F <sub>2</sub> ) <sub>2</sub> | CCSD(T)/CBS | BLYP-D3 | TPSS-D3 | B3LYP-D3 | PBE0-D3 | TPSSh-D3 | PW6B95-D3 | BLYP | TPSS | B3LYP | PBE0 | TPSSh | PW6B95 |
|------------------------------------------------|-------------|---------|---------|----------|---------|----------|-----------|------|------|-------|------|-------|--------|
| Struct1                                        | 1.7         | 1.3     | 1.2     | 1.4      | 1.2     | 1.1      | 1.6       | 0.4  | 0.5  | 0.5   | 0.7  | 0.4   | 1.3    |
| Struct2                                        | 1.1         | 0.7     | 0.6     | 0.8      | 0.7     | 0.6      | 1.0       | 0.3  | 0.2  | 0.3   | 0.4  | 0.2   | 0.8    |
| Struct3                                        | 0.4         | 0.3     | 0.3     | 0.3      | 0.3     | 0.3      | 0.4       | 0.3  | 0.2  | 0.2   | 0.2  | 0.1   | 0.3    |
| Struct4                                        | 0.5         | 0.2     | 0.2     | 0.3      | 0.3     | 0.3      | 0.6       | 0.0  | 0.0  | 0.0   | 0.1  | 0.0   | 0.5    |
| Struct5                                        | 0.0         | 0.0     | 0.0     | 0.0      | 0.0     | 0.0      | 0.0       | 0.2  | 0.0  | 0.1   | 0.0  | 0.0   | 0.0    |
| Struct6                                        | 0.6         | 0.3     | 0.3     | 0.4      | 0.4     | 0.3      | 0.6       | 0.1  | 0.1  | 0.1   | 0.2  | 0.1   | 0.5    |
| (SO <sub>2</sub> ) <sub>2</sub>                | CCSD(T)/CBS | BLYP-D3 | TPSS-D3 | B3LYP-D3 | PBE0-D3 | TPSSh-D3 | PW6B95-D3 | BLYP | TPSS | B3LYP | PBE0 | TPSSh | PW6B95 |
| Struct1                                        | 0.0         | 0.0     | 0.0     | 0.0      | 0.0     | 0.0      | 0.0       | 0.0  | 0.0  | 0.0   | 0.0  | 0.1   | 0.0    |
| Struct2                                        | 0.4         | 0.4     | 0.4     | 0.5      | 0.5     | 0.5      | 0.6       | 0.6  | 0.5  | 0.6   | 0.6  | 0.5   | 0.6    |
| Struct3                                        | 1.7         | 1.5     | 1.1     | 1.7      | 1.4     | 1.6      | 1.6       | 0.5  | 0.5  | 0.9   | 1.0  | 0.4   | 1.3    |
| Struct4                                        | 1.4         | 1.0     | 0.7     | 1.2      | 1.0     | 1.2      | 1.1       | 0.1  | 0.2  | 0.4   | 0.6  | 0.0   | 0.9    |
| Struct5                                        | 0.7         | 0.9     | 0.7     | 1.0      | 0.8     | 1.0      | 0.8       | 0.2  | 0.3  | 0.4   | 0.5  | 0.2   | 0.6    |
| Struct6                                        | 0.1         | 0.3     | 0.3     | 0.3      | 0.3     | 0.4      | 0.4       | 0.2  | 0.2  | 0.2   | 0.2  | 0.1   | 0.4    |
| Struct7                                        | 0.6         | 0.4     | 0.2     | 0.4      | 0.4     | 0.4      | 0.7       | 0.4  | 0.3  | 0.4   | 0.4  | 0.2   | 0.7    |
| Struct8                                        | 0.8         | 0.4     | 0.3     | 0.6      | 0.4     | 0.5      | 0.8       | 0.0  | 0.1  | 0.2   | 0.3  | 0.0   | 0.6    |
| Struct9                                        | 1.9         | 1.6     | 1.3     | 1.7      | 1.6     | 1.8      | 1.5       | 1.5  | 1.2  | 1.7   | 1.6  | 1.1   | 1.5    |

Table S.2. Boltzmann weights of the stationary points on the PES of (CH<sub>2</sub>F<sub>2</sub>)<sub>2</sub> and (SO<sub>2</sub>)<sub>2</sub> employed to compute Boltzmann averaged dissociation energies at CCSD(T)/CBS, DFT-D3/def2-TZVP and DFT/def2-TZVP levels of theory

| (CH <sub>2</sub> F <sub>2</sub> ) <sub>2</sub> | CCSD(T)/CBS | BLYP-D3 | TPSS-D3 | B3LYP-D3 | PBE0-D3 | TPSSh-D3 | PW6B95-D3 | BLYP | TPSS | B3LYP | PBE0 | TPSSh | PW6B95 |
|------------------------------------------------|-------------|---------|---------|----------|---------|----------|-----------|------|------|-------|------|-------|--------|
| Struct1                                        | -           | -       | -       | -        | -       | -        | -         | -    | -    | -     | -    | -     | -      |
| Struct2                                        | 0.07        | 0.12    | 0.15    | 0.10     | 0.13    | 0.14     | 0.09      | 0.21 | 0.21 | 0.19  | 0.17 | 0.22  | 0.11   |
| Struct3                                        | 0.25        | 0.23    | 0.23    | 0.25     | 0.24    | 0.24     | 0.26      | 0.20 | 0.22 | 0.23  | 0.24 | 0.22  | 0.26   |
| Struct4                                        | 0.20        | 0.27    | 0.25    | 0.25     | 0.24    | 0.24     | 0.18      | 0.35 | 0.29 | 0.31  | 0.27 | 0.28  | 0.20   |
| Struct5                                        | 0.47        | 0.39    | 0.37    | 0.40     | 0.39    | 0.38     | 0.48      | 0.24 | 0.28 | 0.28  | 0.32 | 0.28  | 0.44   |
| Struct6                                        | -           | -       | -       | -        | -       | -        | -         | -    | -    | -     | -    | -     | -      |
| $\langle\Delta E\rangle^a$                     | 2.80        | 2.18    | 2.08    | 2.34     | 2.18    | 2.04     | 2.49      | 0.80 | 1.17 | 1.09  | 1.43 | 1.13  | 2.00   |
| $\langle\Delta E\rangle_{\text{all}}^b$        | 2.81        | 2.19    | 2.08    | 2.35     | 2.18    | 2.04     | 2.54      | 0.78 | 1.15 | 1.08  | 1.41 | 1.10  | 2.04   |
| (SO <sub>2</sub> ) <sub>2</sub>                | CCSD(T)/CBS | BLYP-D3 | TPSS-D3 | B3LYP-D3 | PBE0-D3 | TPSSh-D3 | PW6B95-D3 | BLYP | TPSS | B3LYP | PBE0 | TPSSh | PW6B95 |
| Struct1                                        | 0.34        | 0.32    | 0.29    | 0.34     | 0.32    | 0.35     | 0.41      | 0.27 | 0.27 | 0.31  | 0.31 | 0.23  | 0.40   |
| Struct2                                        | 0.17        | 0.16    | 0.15    | 0.16     | 0.15    | 0.14     | 0.15      | 0.10 | 0.12 | 0.11  | 0.11 | 0.11  | 0.13   |
| Struct3                                        | -           | -       | -       | -        | -       | -        | -         | -    | -    | -     | -    | -     | -      |
| Struct4                                        | -           | -       | -       | -        | -       | -        | -         | -    | -    | -     | -    | -     | -      |
| Struct5                                        | -           | -       | -       | -        | -       | -        | -         | -    | -    | -     | -    | -     | -      |
| Struct6                                        | 0.27        | 0.19    | 0.18    | 0.21     | 0.20    | 0.18     | 0.20      | 0.20 | 0.19 | 0.22  | 0.21 | 0.21  | 0.21   |
| Struct7                                        | 0.13        | 0.18    | 0.19    | 0.16     | 0.17    | 0.17     | 0.13      | 0.15 | 0.17 | 0.14  | 0.16 | 0.18  | 0.12   |
| Struct8                                        | 0.09        | 0.16    | 0.18    | 0.13     | 0.15    | 0.15     | 0.11      | 0.28 | 0.25 | 0.22  | 0.20 | 0.27  | 0.13   |
| Struct9                                        | -           | -       | -       | -        | -       | -        | -         | -    | -    | -     | -    | -     | -      |
| $\langle\Delta E\rangle^a$                     | 2.60        | 3.14    | 2.55    | 3.27     | 2.80    | 2.80     | 2.82      | 0.39 | 0.85 | 0.92  | 1.50 | 0.63  | 1.90   |
| $\langle\Delta E\rangle_{\text{all}}^b$        | 2.49        | 3.02    | 2.42    | 3.15     | 2.67    | 2.68     | 2.68      | 0.37 | 0.79 | 0.84  | 1.39 | 0.61  | 1.77   |

<sup>a</sup> Boltzmann averaged theoretical dissociation energy obtained without considering transition state structures.

<sup>b</sup> Boltzmann averaged theoretical dissociation energy obtained considering all conformers.

Table S.3. Geometrical parameters for the most stable (CH<sub>2</sub>F<sub>2</sub>)<sub>2</sub> structure (Struct 5) and comparison to experimental values.<sup>a</sup>

|                      | BLYP   | TPSS   | B3LYP  | PBE0   | TPSSh  | PW6B95 | Experimental <sup>b</sup> |
|----------------------|--------|--------|--------|--------|--------|--------|---------------------------|
| <b>Unit 1</b>        |        |        |        |        |        |        |                           |
| C1H2                 | 109.6  | 109.3  | 109.0  | 109.2  | 109.0  | 108.6  | 108.4                     |
| C1H3                 | 109.6  | 109.3  | 109.0  | 109.2  | 109.0  | 108.6  | 108.4                     |
| C1F4                 | 138.9  | 137.8  | 136.9  | 135.7  | 137.0  | 135.7  | 135.1                     |
| C1F5                 | 138.0  | 137.2  | 136.2  | 135.1  | 136.4  | 135.2  | 135.1                     |
| ∠ H2C1H3             | 114.0  | 114.2  | 113.5  | 113.1  | 113.9  | 113.3  | 112.8                     |
| ∠ F4C1F5             | 108.3  | 108.0  | 108.2  | 108.3  | 108.0  | 108.1  | 108.5                     |
| <b>Unit 2</b>        |        |        |        |        |        |        |                           |
| C7H6                 | 109.7  | 109.4  | 109.1  | 109.3  | 109.1  | 108.7  | 108.4                     |
| C7H8                 | 109.6  | 109.2  | 108.9  | 109.2  | 109.0  | 108.5  | 108.4                     |
| C7F9                 | 138.5  | 137.5  | 136.5  | 135.4  | 136.7  | 135.4  | 135.1                     |
| C7F10                | 138.5  | 137.5  | 136.5  | 135.4  | 136.7  | 135.4  | 135.1                     |
| ∠ H6C7H8             | 114.7  | 114.7  | 114.1  | 113.6  | 114.5  | 113.8  | 112.8                     |
| ∠ F9C7F10            | 108.1  | 108.0  | 108.0  | 108.1  | 107.9  | 107.9  | 108.5                     |
| <b>Interfragment</b> |        |        |        |        |        |        |                           |
| C1C2                 | 355.9  | 366.5  | 353.0  | 356.6  | 360.9  | 356.1  | 354.4                     |
| H2F10                | 276.7  | 288.6  | 273.6  | 277.6  | 282.0  | 273.7  | 276.5                     |
| H3F9                 | 276.7  | 288.6  | 273.6  | 277.6  | 282.0  | 273.7  | 276.5                     |
| H8F4                 | 262.3  | 271.2  | 261.1  | 265.2  | 268.3  | 270.1  | 263.0                     |
| ∠ C1H3F9             | 110.5  | 109.2  | 109.2  | 109.1  | 109.3  | 107.6  | -                         |
| ∠ C1H2F10            | 110.5  | 109.2  | 109.2  | 109.1  | 109.3  | 107.6  | -                         |
| ∠ C7H8F4             | 113.5  | 112.3  | 110.1  | 109.9  | 111.4  | 103.9  | -                         |
| ∠ F5C1C7F9           | -119.6 | -119.5 | -118.8 | -118.9 | -119.2 | -117.0 | -                         |
| $\alpha^c$           | 5.9    | 6.5    | 7.9    | 7.3    | 7.1    | 12.6   | 7.2                       |
| $\beta^c$            | 7.0    | 8.6    | 8.8    | 8.5    | 8.3    | 10.5   | 8.9                       |
| MD lengths           | 1.6    | 4.8    | -0.1   | 0.9    | 2.7    | 0.4    | -                         |
| MAD lengths          | 1.8    | 4.8    | 1.4    | 0.9    | 2.7    | 1.4    | -                         |
| MD angles            | -0.1   | 0.2    | 0.3    | 0.0    | 0.2    | 1.2    | -                         |
| MAD angles           | 1.2    | 0.9    | 0.6    | 0.4    | 0.8    | 1.6    | -                         |

<sup>a</sup> Lengths and degrees are expressed in pm and deg, respectively. For atom labeling see Figure S.2<sup>b</sup> From Ref. [23].<sup>c</sup> See Ref. [23] for definition of this angle.

Table S.4. Geometrical parameters for the most stable (SO<sub>2</sub>)<sub>2</sub> structure (Struct 1) and comparison to experimental values.<sup>a</sup>

|                        | BLYP   | TPSS   | B3LYP  | PBE0   | TPSSh  | PW6B95 | Experimental |
|------------------------|--------|--------|--------|--------|--------|--------|--------------|
| <b>Unit 1</b>          |        |        |        |        |        |        |              |
| S1O2                   | 146.6  | 145.7  | 144.2  | 143.4  | 144.7  | 143.1  | 143.1        |
| S1O3                   | 146.2  | 145.3  | 143.8  | 143.0  | 144.2  | 142.8  | 143.1        |
| ∠ O2S1O3               | 118.3  | 118.4  | 118.3  | 118.3  | 118.2  | 118.3  | 119.3        |
| <b>Unit 2</b>          |        |        |        |        |        |        |              |
| S4O5                   | 146.3  | 145.4  | 144.0  | 143.2  | 144.4  | 142.9  | 143.1        |
| S4O6                   | 146.3  | 145.4  | 144.0  | 143.2  | 144.4  | 142.9  | 143.1        |
| ∠ O5S4O6               | 118.4  | 118.5  | 118.3  | 118.4  | 118.3  | 118.3  | 119.3        |
| <b>Interfragment</b>   |        |        |        |        |        |        |              |
| S1O5                   | 353.5  | 359.2  | 350.7  | 355.7  | 344.3  | 344.4  | -            |
| S1O6                   | 353.5  | 359.2  | 350.7  | 355.7  | 344.3  | 344.4  | -            |
| S1S4                   | 370.6  | 381.8  | 371.0  | 375.6  | 358.5  | 374.4  | -            |
| S4O2                   | 315.9  | 329.1  | 314.7  | 317.1  | 305.3  | 329.4  | -            |
| <i>R</i> <sub>cm</sub> | 369.8  | 378.9  | 368.1  | 372.6  | 359.0  | 368.8  | 382.2        |
| ∠ S1O2S4               | 100.0  | 99.7   | 101.3  | 102.7  | 99.4   | 96.8   | -            |
| ∠ O2S4O5               | 82.6   | 80.0   | 81.0   | 81.1   | 83.9   | 76.3   | -            |
| ∠ O2S4O6               | 82.6   | 80.0   | 81.0   | 81.1   | 83.9   | 76.3   | -            |
| ∠ O3S1O2S4             | -180.0 | -180.0 | -180.0 | -180.0 | -180.0 | -180.0 | -            |
| ∠ S1O2S4O5             | -60.0  | -60.8  | -60.4  | -60.4  | -59.7  | -62.1  | -            |
| ∠ S1O2S4O6             | 60.4   | 60.8   | 60.4   | 60.4   | 59.7   | 60.4   | -            |
| $\theta_1^d$           | 117.6  | 122.6  | 120.6  | 120.0  | 115.3  | 131.3  | 127          |
| $\theta_2^d$           | 53.8   | 53.3   | 54.8   | 55.8   | 53.4   | 51.3   | 60.5         |
| MD lengths             | 0.1    | 1.2    | -2.1   | -1.8   | -3.6   | -2.8   | -            |
| MAD lengths            | 5.1    | 2.5    | 3.5    | 2.0    | 5.7    | 2.8    | -            |
| MD angles              | -4.5   | -3.3   | -3.5   | -3.4   | -5.2   | -1.7   | -            |
| MAD angles             | 4.5    | 3.3    | 3.5    | 3.4    | 5.2    | 3.9    | -            |

<sup>a</sup> Lengths and degrees are expressed in pm and deg, respectively. For atom labeling see Figure S.3

<sup>b</sup> From Ref. [29].

<sup>c</sup> Distance between the centers of mass of the two fragments.

<sup>d</sup> See Ref. [29] for definition of this angle.

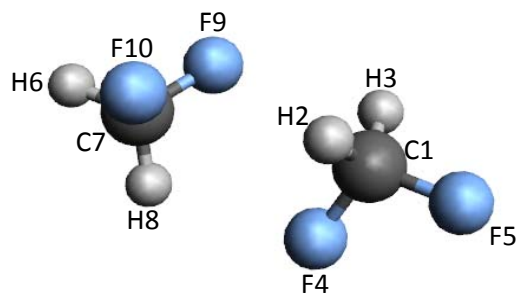

Figure S.2. Labeling of atoms within structure 5 of  $(\text{CH}_2\text{F}_2)_2$ .

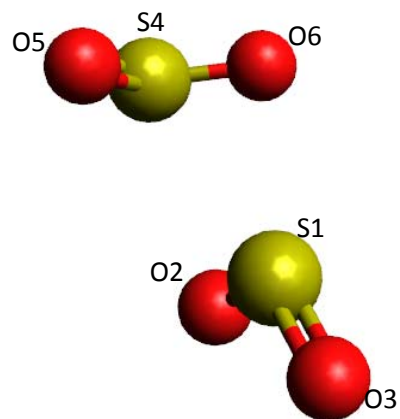

Figure S.3. Labeling of atoms within structure 1 of  $(\text{SO}_2)_2$ .
